# Supplementary material for: Remote diagnosis of surgical-site infection using a mobile digital intervention: a randomised controlled trial in emergency surgery patients
Source: PubMed Central journal article supplement (PMC8602321; doi:10.1038/s41746-021-00526-0), 2021-11-18
Supplement: 41746_2021_526_MOESM1_ESM.pdf [file 41746_2021_526_MOESM1_ESM.pdf]

## Supplement:

**Supplementary Table 1: Smartphone-delivered wound assessment tool**

| Question                                                                                                    | Response                                                                                 |
|-------------------------------------------------------------------------------------------------------------|------------------------------------------------------------------------------------------|
| 1. Is the pain worse than immediately after the operation?                                                  | No, Yes                                                                                  |
| 2. Is there new redness around your wound site excluding the wound itself?                                  | No, Yes                                                                                  |
| 3. Is there more swelling around your wound site than at the time of surgery?                               | No, Yes                                                                                  |
| 4. Are you experiencing a new burning sensation or heat at the wound site?                                  | No, Yes                                                                                  |
| 5. Is there liquid coming from the wound site? If so, please select which option best describes the liquid. | No, Yes – clear, Yes – bloody, Yes – yellowish,<br>Yes – thick/yellow, Yes – green/brown |
| 6. Is your wound opening or gaping?                                                                         | No, Yes                                                                                  |
| 7. Have you experienced fevers in the last 24 hours?                                                        | No, Yes                                                                                  |
| 8. Please upload a photograph of your wound.                                                                | [Photograph]                                                                             |

**Supplementary Table 2:** 30-day surgical site infection (SSI) outcomes.

|                                                  |                | 30-day Surgical Site Infection (SSI) |                     |       |
|--------------------------------------------------|----------------|--------------------------------------|---------------------|-------|
|                                                  |                | Smartphone (n=21)                    | Routine Care (n=20) | p     |
| SSI Severity                                     | Superficial    | 16 (76.2%)                           | 16 (80.0%)          | 0.555 |
|                                                  | Deep           | 2 (9.5%)                             | 3 (15.0%)           |       |
|                                                  | Organ-space    | 3 (14.3%)                            | 1 (5.0%)            |       |
| SSI-associated complication rate (Clavien-Dindo) | Grade I-II     | 19 (90.5%)                           | 18 (90.0%)          | 0.959 |
|                                                  | Grade III-IV * | 2 (9.5%)                             | 2 (10.0%)           |       |

\* No deaths associated with surgical-site infection were recorded within 30-days.

**Supplementary Table 3:** Characteristics associated with patient compliance with the intervention.

|                                      |                        | Use of the smartphone tool |             |       |
|--------------------------------------|------------------------|----------------------------|-------------|-------|
|                                      |                        | No (n=72)                  | Yes (n=151) | p     |
| Age (years)                          | Mean (SD)              | 43.2 (17.1)                | 41.1 (17.3) | 0.356 |
| Sex                                  | Female                 | 36 (50.0)                  | 81 (53.6)   | 0.611 |
|                                      | Male                   | 36 (50.0)                  | 70 (46.4)   |       |
| Ethnicity                            | White                  | 70 (97.2)                  | 143 (94.7)  | 0.395 |
|                                      | BAME                   | 2 (2.8)                    | 8 (5.3)     |       |
| Diabetes Mellitus                    | No                     | 69 (95.8)                  | 144 (95.4)  | 0.874 |
|                                      | Yes                    | 3 (4.2)                    | 7 (4.6)     |       |
| Body Mass Index                      | Not Obese              | 51 (71.8)                  | 110 (73.8)  | 0.755 |
|                                      | Obese                  | 20 (28.2)                  | 39 (26.2)   |       |
| Immunosuppression                    | No                     | 70 (97.2)                  | 144 (95.4)  | 0.510 |
|                                      | Yes                    | 2 (2.8)                    | 7 (4.6)     |       |
| Operative Complexity                 | Minor or Intermediate  | 12 (16.7)                  | 25 (16.6)   | 0.983 |
|                                      | Major or Complex major | 60 (83.3)                  | 126 (83.4)  |       |
| Operative Approach                   | Laparoscopic           | 52 (72.2)                  | 116 (76.8)  | 0.456 |
|                                      | Open                   | 20 (27.8)                  | 35 (23.2)   |       |
| Operative Contamination              | Clean-Contaminated     | 59 (81.9)                  | 111 (73.5)  | 0.166 |
|                                      | Contaminated / Dirty   | 13 (18.1)                  | 40 (26.5)   |       |
| 30-day Surgical Site Infection (SSI) | No                     | 63 (87.5)                  | 139 (92.1)  | 0.276 |
|                                      | Yes                    | 9 (12.5)                   | 12 (7.9)    |       |
